# Supplementary material for: The Effects of Ferric Sulfate (Fe2(SO4)3) on the Removal of Cyanobacteria and Cyanotoxins: A Mesocosm Experiment
Source: MDPI journal article supplement (doi:10.3390/toxins13110753), 2021-10-23
Supplement: s1 [file s1]

# Supplementary Materials: The Effects of Ferric Sulfate ( $\text{Fe}_2(\text{SO}_4)_3$ ) on the Removal of Cyanobacteria and Cyanotoxins: A Mesocosm Experiment

Kim Thien Nguyen Le, Eyerusalem Goitom, Hana Trigui, Sébastien Sauvé, Michèle Prévost and Sarah Dörner

**Table S1.** List of cyanobacteria species. Associated toxin information adapted from [1].

| No | MB                    |                            | PLSF                  |                            | Associated toxin group belonging to genera                             |
|----|-----------------------|----------------------------|-----------------------|----------------------------|------------------------------------------------------------------------|
|    | Genera                | Species                    | Genera                | Species                    |                                                                        |
| 1  | <i>Aphanizomenon</i>  | <i>A. flos-aquae</i>       | <i>Aphanizomenon</i>  | <i>A. flos-aquae</i>       | Anatoxin-a (ANA-a), Cylindrospermopsin (CYN), Saxitoxin (STX)          |
|    |                       | <i>A. issatschenkoi</i>    |                       | <i>A. issatschenkoi</i>    |                                                                        |
|    |                       | <i>A. gracile</i>          |                       |                            |                                                                        |
| 2  | <i>Aphanocapsa</i>    | <i>A. delicatissima</i>    | <i>Aphanocapsa</i>    | <i>A. delicatissima</i>    |                                                                        |
|    |                       | <i>A. planctonica</i>      |                       | <i>A. planctonica</i>      |                                                                        |
|    |                       | <i>A. holsatica</i>        |                       |                            |                                                                        |
| 3  | <i>Aphanothece</i>    | <i>A. clathrata brevis</i> | <i>Aphanothece</i>    | <i>A. clathrata brevis</i> |                                                                        |
|    |                       | <i>A. nidulans</i>         |                       |                            |                                                                        |
|    |                       | <i>A. smithii</i>          |                       |                            |                                                                        |
| 4  | <i>Chroococcus</i>    | <i>C. limneticus</i>       | <i>Chroococcus</i>    | <i>C. limneticus</i>       |                                                                        |
|    |                       | <i>C. minimus</i>          |                       | <i>C. dispersus</i>        |                                                                        |
|    |                       | <i>C. prescottii</i>       |                       | <i>C. prescottii</i>       |                                                                        |
| 5  | <i>Coelosphaerium</i> | <i>C. kuetzinggianum</i>   | <i>Coelosphaerium</i> | <i>C. kuetzinggianum</i>   |                                                                        |
| 6  | <i>Dolichospermum</i> | <i>D. spiroides</i>        | <i>Dolichospermum</i> | <i>D. spiroides</i>        | Microcystis (MC), Anatoxin-a (ANA-a), Anatoxin-a (S), Saxitoxins (STX) |
|    |                       | <i>D. circinalis</i>       |                       | <i>D. circinalis</i>       |                                                                        |
|    |                       | <i>D. planctonicum</i>     |                       | <i>D. planctonicum</i>     |                                                                        |
|    |                       |                            |                       | <i>D. mendotae</i>         |                                                                        |
| 7  | <i>Merismopedia</i>   | <i>M. tenuissima</i>       | <i>Merismopedia</i>   | <i>M. tenuissima</i>       |                                                                        |
|    |                       | <i>M. punctata</i>         |                       | <i>M. punctata</i>         |                                                                        |
|    |                       | <i>M. minima</i>           |                       | <i>M. minima</i>           |                                                                        |
| 8  | <i>Microcystis</i>    | <i>M. aeruginosa</i>       | <i>Microcystis</i>    | <i>M. aeruginosa</i>       | Microcystin (MC)                                                       |
|    |                       | <i>M. wesenbergii</i>      |                       | <i>M. wesenbergii</i>      |                                                                        |
| 9  | <i>Pseudanabaena</i>  | <i>P. limnetica</i>        | <i>Pseudanabaena</i>  | <i>P. limnetica</i>        |                                                                        |
|    |                       | <i>P. mucicola</i>         |                       |                            |                                                                        |

**Table S2.** Removal effectiveness (%) of taxonomic cell counts of individual cyanobacterial genus after 48 hours (Mean±Standard deviation).

| Event                          | Treat     | Total cell counts | <i>Aphanizomenon</i> | <i>Aphanocapsa</i> | <i>Aphanothece</i> | <i>Chroococcus</i> | <i>Coelosphaerium</i> | <i>Dolichospermum</i> | <i>Merismopedia</i> | <i>Microcystis</i> | <i>Pseudanabaena</i> |
|--------------------------------|-----------|-------------------|----------------------|--------------------|--------------------|--------------------|-----------------------|-----------------------|---------------------|--------------------|----------------------|
| MB Sep-<br>10-12, 2018         | 20 mgFe/L | 99.96±0.04        | 97.84±3.05           | 100.0±0.00         | 98.30±0.21         | 100.0±0.00         | NA                    | 99.88±0.04            | 100.0±0.00          | 99.97±0.01         | 99.97±2.81           |
|                                | 35 mgFe/L | 99.94±0.04        | 97.69±1.12           | 100.0±0.00         | 97.27±0.11         | 100.0±0.00         | NA                    | 99.81±0.05            | 100.0±0.00          | 99.65±0.05         | 97.75±0.79           |
| MB Sep-<br>24-26, 2018         | 20 mgFe/L | 71.91±5.38        | 68.55±1.94           | 89.27±6.55         | 64.38±2.83         | NA                 | NA                    | 75.22±7.48            | 100.0±0.00          | 86.92±2.14         | 72.69±3.93           |
|                                | 35 mgFe/L | 96.39±1.29        | 80.58±7.53           | 76.56±2.31         | 69.09±1.63         | NA                 | NA                    | 98.51±1.19            | 100.0±0.00          | 93.98±2.61         | 71.59±8.54           |
| MB<br>August 13-<br>15, 2019   | 20 mgFe/L | 94.27±1.67        | 93.91±1.64           | NA                 | 87.73±6.22         | NA                 | 100.0±0.00            | 97.17±3.14            | NA                  | 86.55±1.62         | NA                   |
|                                | 35 mgFe/L | 99.35±0.11        | 99.26±0.15           | NA                 | 96.51±1.44         | NA                 | 100.0±0.00            | 99.97±0.01            | NA                  | 100.0±0.00         | NA                   |
| PLSF<br>June<br>26-28, 2019    | 20 mgFe/L | 85.22±6.43        | 77.17±8.16           | NA                 | -37.5±1.67         | NA                 | 35.11±5.01            | 84.66±4.07            | NA                  | 92.66±8.64         | NA                   |
|                                | 35 mgFe/L | 98.99±1.06        | 98.66±1.44           | NA                 | 88.50±4.58         | NA                 | 100.0±0.00            | 99.03±0.95            | NA                  | 95.82±4.36         | NA                   |
| PLSF<br>July<br>24-26, 2019    | 20 mgFe/L | 51.98±6.21        | 76.76±4.51           | NA                 | -13.5±1.24         | 100.0±0.00         | 19.36±1.14            | 66.57±4.71            | 77.5±0.28           | 66.99±0.95         | NA                   |
|                                | 35 mgFe/L | 99.11±0.11        | 97.93±0.28           | NA                 | 92.65±0.96         | 100.0±0.00         | 100.0±0.00            | 100.0±0.00            | 100.0±0.00          | 100.0±0.00         | NA                   |
| PLSF<br>August 05-<br>07, 2019 | 20 mgFe/L | 78.21±6.72        | 72.22±6.32           | NA                 | 79.47±4.98         | 100.0±0.00         | 75.86±4.33            | 77.97±5.04            | 92.14±3.59          | 96.51±5.39         | NA                   |
|                                | 35 mgFe/L | 99.72±0.65        | 98.22±0.65           | NA                 | 93.46±2.34         | NA                 | 100.0±0.00            | 100.0±0.00            | 100.0±0.00          | 99.97±0.01         | NA                   |

$$\text{Removal effectiveness percentage (\%)} = \frac{T_0 - T_{48}}{T_0} \times 100.$$

NA: no value

**Table S3.** Pairwise Kruskal-Wallis test, showing differences in removal of total cell counts and individual cyanobacterial genus between control mesocosms and mesocosms with dose of 20 mgFe/L, control mesocosms and mesocosms with dose of 35 mgFe/L, mesocosms with dose of 20 mgFe/L and 35 mgFe/L in Missisquoi Bay and Petit-Lac-St-François (*p*-value< 0.05 is significant).

| Species               | <i>p</i> -value   |                   |                     | <i>df</i> | <i>chi-squared</i> | <i>p</i> -value |
|-----------------------|-------------------|-------------------|---------------------|-----------|--------------------|-----------------|
|                       | control-20 mgFe/L | control-35 mgFe/L | 20 mgFe/L-35 mgFe/L |           |                    |                 |
| <i>Dolichospermum</i> | 0.002             | <0.001            | 0.001               | 2         | 24.12              | 5.7E-06         |
| <i>Aphanothece</i>    | 0.018             | <0.001            | 0.003               | 2         | 17.81              | 0.0001          |
| <i>Chroococcus</i>    | 0.047             | 0.019             | 0.018               | 2         | 7.49               | 0.0236          |
| <i>Aphanocapsa</i>    | 0.084             | 0.281             | 0.758               | 2         | 5.16               | 0.0754          |
| <i>Microcystis</i>    | <0.001            | <0.001            | 0.013               | 2         | 23.68              | 7.1E-06         |
| <i>Merismopedia</i>   | 0.009             | 0.019             | 0.021               | 2         | 8.65               | 0.0132          |
| <i>Aphanizomenon</i>  | 0.009             | <0.001            | 0.019               | 2         | 13.66              | 0.0010          |
| <i>Coelosphaerium</i> | 0.558             | 0.043             | 0.011               | 2         | 6.43               | 0.0401          |
| Total cell counts     | 0.002             | <0.001            | 0.043               | 2         | 18.59              | 9.1E-05         |

**Table S4.** Removal effectiveness (%) of total intracellular microcystins (intracellular  $\Sigma$ MCs) and individual intracellular cyanotoxins in mesocosms with dose of 20 mgFe/L and 35 mgFe/L after 48 hours (Mean $\pm$ Standard deviation). Dominant and representative cyanotoxins are shown.

| Event                          | Treat     | $\Sigma$ MCs     | MC-LR            | MC-RR            | MC-LY            | MC-LA             | CYN               | ANA             | APA              | APB              |
|--------------------------------|-----------|------------------|------------------|------------------|------------------|-------------------|-------------------|-----------------|------------------|------------------|
| MB Sep-<br>10-12, 2018         | 20 mgFe/L | 99.91 $\pm$ 0.15 | 99.67 $\pm$ 0.05 | 99.70 $\pm$ 0.10 | 60.58 $\pm$ 0.51 | 97.86 $\pm$ 0.14  | -87.91 $\pm$ 0.46 | -140 $\pm$ 4.34 | 98.72 $\pm$ 2.78 | 99.09 $\pm$ 1.81 |
|                                | 35 mgFe/L | 99.92 $\pm$ 0.02 | 99.70 $\pm$ 0.09 | 99.74 $\pm$ 0.05 | 61.57 $\pm$ 0.19 | 98.21 $\pm$ 0.41  | NA                | -150 $\pm$ 5.21 | 98.61 $\pm$ 4.56 | 99.21 $\pm$ 1.89 |
| MB Sep-<br>24-26, 2018         | 20 mgFe/L | 99.65 $\pm$ 0.01 | 99.95 $\pm$ 0.02 | 99.86 $\pm$ 1.89 | 89.43 $\pm$ 2.03 | 99.76 $\pm$ 2.92  | NA                | -23 $\pm$ 0.98  | 80.11 $\pm$ 1.23 | 90.91 $\pm$ 1.12 |
|                                | 35 mgFe/L | 99.89 $\pm$ 0.02 | 99.89 $\pm$ 0.03 | 99.86 $\pm$ 2.11 | 85.53 $\pm$ 1.32 | 99.71 $\pm$ 2.87  | NA                | -98 $\pm$ 2.11  | 88.31 $\pm$ 0.78 | 90.58 $\pm$ 2.78 |
| MB<br>August 13-<br>15, 2019   | 20 mgFe/L | 98.92 $\pm$ 1.01 | 99.15 $\pm$ 0.58 | 99.47 $\pm$ 0.04 | 92.34 $\pm$ 1.34 | 98.06 $\pm$ 0.37  | 43.37 $\pm$ 2.35  | NA              | 99.77 $\pm$ 1.34 | 93.21 $\pm$ 0.03 |
|                                | 35 mgFe/L | 99.70 $\pm$ 0.19 | 99.52 $\pm$ 0.01 | 99.91 $\pm$ 0.04 | 95.39 $\pm$ 0.98 | 96.06 $\pm$ 0.24  | 70.01 $\pm$ 1.56  | NA              | 99.29 $\pm$ 1.45 | 99.81 $\pm$ 2.01 |
| PLSF<br>June<br>26-28, 2019    | 20 mgFe/L | 97.97 $\pm$ 0.26 | 98.33 $\pm$ 1.50 | 90.83 $\pm$ 0.13 | 97.81 $\pm$ 2.31 | 97.58 $\pm$ 0.05  | NA                | NA              | NA               | 91.27 $\pm$ 1.09 |
|                                | 35 mgFe/L | 99.83 $\pm$ 1.12 | 99.96 $\pm$ 1.01 | 89.77 $\pm$ 0.05 | 99.88 $\pm$ 1.14 | 96.42 $\pm$ 0.01  | NA                | NA              | 42.25 $\pm$ 3.45 | 91.16 $\pm$ 0.13 |
| PLSF<br>July<br>24-26, 2019    | 20 mgFe/L | 99.75 $\pm$ 0.07 | 99.37 $\pm$ 0.24 | 43.92 $\pm$ 2.01 | 98.62 $\pm$ 1.07 | -44.01 $\pm$ 0.03 | NA                | NA              | NA               | 22.94 $\pm$ 2.34 |
|                                | 35 mgFe/L | 99.75 $\pm$ 0.03 | 99.90 $\pm$ 0.25 | 58.86 $\pm$ 0.19 | 99.45 $\pm$ 0.46 | 3.65 $\pm$ 0.01   | NA                | NA              | NA               | 33.81 $\pm$ 2.23 |
| PLSF<br>August 05-<br>07, 2019 | 20 mgFe/L | 98.96 $\pm$ 0.41 | 99.56 $\pm$ 0.32 | 76.46 $\pm$ 0.81 | 98.57 $\pm$ 1.45 | -109 $\pm$ 0.04   | NA                | NA              | NA               | 50.86 $\pm$ 0.09 |
|                                | 35 mgFe/L | 98.05 $\pm$ 3.81 | 99.22 $\pm$ 0.69 | 85.59 $\pm$ 0.91 | 97.26 $\pm$ 2.06 | -46.98 $\pm$ 0.98 | -130              | NA              | NA               | 72.53 $\pm$ 0.81 |

$$\text{Removal effectiveness percentage (\%)} = \frac{T_0 - T_{48}}{T_0} \times 100.$$

NA: no value

**Table S5.** Pairwise Kruskal-Wallis test, showing differences in removal of total intracellular microcystins (intracellular  $\Sigma$ MCs) and individual intracellular cyanotoxins between control mesocosms and mesocosms with dose of 20 mgFe/L, control mesocosms and mesocosms with dose of 35 mgFe/L, mesocosms with dose of 20 mgFe/L and 35 mgFe/L in Missisquoi Bay and Petit-Lac-St-François ( $p$ -value<0.05 is significant).

| Toxins                   | $p$ -value        |                   |                     | $df$ | $chi$ -squared | $p$ -value |
|--------------------------|-------------------|-------------------|---------------------|------|----------------|------------|
|                          | control-20 mgFe/L | control-35 mgFe/L | 20 mgFe/L-35 mgFe/L |      |                |            |
| MC-LR                    | <0.001            | <0.001            | 0.386               | 2    | 20.12          | 4.2E-05    |
| MC-LA                    | 0.057             | 0.050             | 0.603               | 2    | 4.76           | 0.0922     |
| MC-LY                    | <0.001            | 0.001             | 0.488               | 2    | 14.61          | 0.0006     |
| MC-RR                    | 0.003             | 0.001             | 0.453               | 2    | 11.31          | 0.0034     |
| MC-LF                    | 0.078             | 0.021             | 0.475               | 2    | 5.96           | 0.0501     |
| MC-LW                    | 0.356             | 0.119             | 0.681               | 2    | 2.44           | 0.2941     |
| MC-HiIR                  | 0.005             | 0.004             | 0.862               | 2    | 11.05          | 0.0039     |
| MC-YR                    | 0.073             | 0.098             | 0.802               | 2    | 4.19           | 0.1235     |
| MC-WR                    | 0.785             | 0.811             | 0.335               | 2    | 0.56           | 0.7548     |
| MC-HtyR                  | 0.864             | 0.547             | 0.381               | 2    | 1.15           | 0.561      |
| [Asp <sup>3</sup> ]MC-LR | 0.001             | 0.001             | 0.876               | 2    | 20.05          | 4.4E-5     |
| [Asp <sup>3</sup> ]MC-RR | 0.423             | 0.388             | 0.524               | 2    | 0.95           | 0.619      |
| CYN                      | 0.328             | 0.626             | 0.684               | 2    | 0.91           | 0.6348     |
| ANA-a                    | 0.169             | 0.054             | 0.409               | 2    | 3.99           | 0.1354     |
| AP-A                     | 0.324             | 0.129             | 0.862               | 2    | 2.16           | 0.3385     |
| AP-B                     | 0.083             | 0.024             | 0.184               | 2    | 6.69           | 0.0334     |
| $\Sigma$ MCs             | <0.001            | <0.001            | 0.057               | 2    | 24.98          | 3.7E-06    |

**Table S6.** Pairwise Kruskal-Wallis test, showing differences in removal of total extracellular microcystins (extracellular  $\Sigma$ MCs) and individual extracellular cyanotoxins between control mesocosms and mesocosms with dose of 20 mgFe/L, control mesocosms and mesocosms with dose of 35 mgFe/L, mesocosms with dose of 20 mgFe/L and 35 mgFe/L in Missisquoi Bay and Petit-Lac-St-François ( $p$ -value <0.05 is significant).

| Toxins                   | <i>p</i> -value   |                   |                     | <i>df</i> | <i>chi-squared</i> | <i>p</i> -value |
|--------------------------|-------------------|-------------------|---------------------|-----------|--------------------|-----------------|
|                          | control-20 mgFe/L | control-35 mgFe/L | 20 mgFe/L-35 mgFe/L |           |                    |                 |
| MC-LR                    | 0.053             | 0.564             | 0.113               | 2         | 5.10               | 0.078           |
| MC-LA                    | 0.684             | 0.172             | 0.148               | 2         | 1.36               | 0.505           |
| MC-LY                    | 0.965             | 0.073             | 0.231               | 2         | 6.28               | 0.043           |
| MC-RR                    | 0.355             | 0.369             | 0.488               | 2         | 2.51               | 0.285           |
| MC-LW                    | 0.149             | 0.616             | 0.514               | 2         | 2.11               | 0.347           |
| [Asp <sup>3</sup> ]MC-LR | 0.149             | 0.569             | 0.076               | 2         | 2.95               | 0.228           |
| [Asp <sup>3</sup> ]MC-RR | 0.088             | 0.089             | 0.771               | 2         | 4.37               | 0.112           |
| CYN                      | 0.306             | 0.151             | 0.094               | 2         | 2.15               | 0.340           |
| AP-A                     | 0.056             | 0.099             | 0.894               | 2         | 2.56               | 0.227           |
| AP-B                     | 0.208             | 0.089             | 0.414               | 2         | 2.55               | 0.278           |
| EMCs                     | 0.225             | 0.525             | 0.106               | 2         | 7.04               | 0.029           |

Table S7. Environmental conditions of lake water samples in control mesocosms at T48 (Mean  $\pm$  standard deviation).

| Parameters                  | Missisquoi Bay                  |                                 |                              | Petit-Lac-St-François      |                            |                              |
|-----------------------------|---------------------------------|---------------------------------|------------------------------|----------------------------|----------------------------|------------------------------|
|                             | Event A<br>September 12<br>2018 | Event B<br>September 26<br>2018 | Event C<br>August 15<br>2019 | Event a<br>June 28<br>2019 | Event b<br>July 26<br>2019 | Event c<br>August 07<br>2019 |
| Chlorophyll- <i>a</i> (RFU) | -                               | -                               | 64.72 $\pm$ 0.59             | 3.37 $\pm$ 0.32            | 5.63 $\pm$ 0.16            | 7.88 $\pm$ 0.17              |
| Phycocyanin (RFU)           | -                               | -                               | 169.21 $\pm$ 0.34            | 16.42 $\pm$ 0.15           | 0.87 $\pm$ 0.03            | 6.78 $\pm$ 0.16              |
| pH                          | 7.47 $\pm$ 0.07                 | -                               | 6.33 $\pm$ 0.09              | 9.93 $\pm$ 0.06            | 8.36 $\pm$ 0.07            | 7.37 $\pm$ 0.15              |
| TDS (mg/L)                  | 105 $\pm$ 0.00                  | -                               | 140.0 $\pm$ 4.24             | 151.0 $\pm$ 5.65           | 118.5 $\pm$ 0.71           | 121.0 $\pm$ 0.00             |
| Temp (°C)                   | 22.7 $\pm$ 0.17                 | -                               | 22.09 $\pm$ 0.17             | 27.81 $\pm$ 0.41           | 25.37 $\pm$ 0.34           | 25.25 $\pm$ 0.02             |
| TOC (mg C/L)                | 19.97 $\pm$ 0.24                | 5.46 $\pm$ 0.00                 | 700.0 $\pm$ 23.19            | 11.39 $\pm$ 0.23           | 10.57 $\pm$ 0.21           | 10.19 $\pm$ 0.44             |
| DOC (mg C/L)                | 12.17 $\pm$ 0.39                | 5.08 $\pm$ 0.05                 | 73.48 $\pm$ 1.45             | 9.83 $\pm$ 0.06            | 10.07 $\pm$ 0.83           | 9.81 $\pm$ 0.07              |
| TN (mg N/L)                 | 5.46 $\pm$ 0.69                 | 1.68 $\pm$ 0.01                 | 6.84 $\pm$ 1.78              | 11.21 $\pm$ 1.07           | 1.01 $\pm$ 0.15            | 1.28 $\pm$ 0.05              |
| TP (µg P/L)                 | 320.92 $\pm$ 4.48               | 177.49 $\pm$ 21.03              | 2074.60 $\pm$ 20.22          | 603.01 $\pm$ 3.17          | 72.08 $\pm$ 5.32           | 89.29 $\pm$ 4.81             |
| DN (mg N/L)                 | 2.02 $\pm$ 0.001                | 0.48 $\pm$ 0.009                | 1.56 $\pm$ 0.11              | 0.91 $\pm$ 0.25            | 0.58 $\pm$ 0.00            | 0.63 $\pm$ 0.03              |
| DP (µg P/L)                 | 40.47 $\pm$ 1.17                | 15.43 $\pm$ 0.25                | 215.01 $\pm$ 11.61           | 108.06 $\pm$ 2.22          | 16.46 $\pm$ 1.16           | 21.81 $\pm$ 2.13             |

**Table S8.** Environmental conditions of lake water samples in mesocosms with dose of 20 mgFe/L at T48 (Mean  $\pm$  standard deviation).

| Parameters                  | Missisquoi Bay                  |                                 |                              | Petit-Lac-St-François      |                            |                              |
|-----------------------------|---------------------------------|---------------------------------|------------------------------|----------------------------|----------------------------|------------------------------|
|                             | Event A<br>September 12<br>2018 | Event B<br>September 26<br>2018 | Event C<br>August 15<br>2019 | Event a<br>June 28<br>2019 | Event b<br>July 26<br>2019 | Event c<br>August 07<br>2019 |
| Chlorophyll- <i>a</i> (RFU) | -                               | -                               | 1.04 $\pm$ 0.002             | 0.08 $\pm$ 0.00            | 1.18 $\pm$ 0.01            | 0.82 $\pm$ 0.07              |
| Phycocyanin (RFU)           | -                               | -                               | 33.69 $\pm$ 5.21             | 0.49 $\pm$ 0.05            | 0.54 $\pm$ 0.00            | 1.03 $\pm$ 0.05              |
| pH                          | 4.9 $\pm$ 0.04                  | -                               | 5.08 $\pm$ 1.01              | 6.09 $\pm$ 0.01            | 7.70 $\pm$ 0.19            | 5.66 $\pm$ 0.02              |
| TDS (mg/L)                  | 138 $\pm$ 0.00                  | -                               | 152.00 $\pm$ 0.00            | 130.00 $\pm$ 0.00          | 139.00 $\pm$ 0.00          | 146.00 $\pm$ 0.00            |
| Temp (°C)                   | 21.8 $\pm$ 0.01                 | -                               | 22.95 $\pm$ 0.04             | 23.92 $\pm$ 0.02           | 25.21 $\pm$ 0.01           | 25.03 $\pm$ 0.01             |
| TOC (mg C/L)                | 4.52 $\pm$ 0.15                 | 2.22 $\pm$ 0.09                 | 23.76 $\pm$ 4.52             | 17.56 $\pm$ 2.71           | 3.81 $\pm$ 0.51            | 3.69 $\pm$ 0.11              |
| DOC (mg C/L)                | 3.21 $\pm$ 0.03                 | 2.39 $\pm$ 0.03                 | 22.62 $\pm$ 1.92             | 15.10 $\pm$ 2.87           | 3.63 $\pm$ 0.24            | 3.44 $\pm$ 0.01              |
| TN (mg N/L)                 | 0.67 $\pm$ 0.01                 | 1.29 $\pm$ 0.01                 | 4.16 $\pm$ 1.01              | 3.71 $\pm$ 0.48            | 0.55 $\pm$ 0.007           | 0.35 $\pm$ 0.009             |
| TP ( $\mu$ g P/L)           | 8.47 $\pm$ 0.35                 | 126.02 $\pm$ 14.54              | 167.73 $\pm$ 6.34            | 130.02 $\pm$ 14.49         | 20.12 $\pm$ 1.15           | 14.73 $\pm$ 0.71             |
| DN (mg N/L)                 | 0.64 $\pm$ 0.001                | 0.39 $\pm$ 0.01                 | 3.28 $\pm$ 0.29              | 1.28 $\pm$ 0.04            | 0.36 $\pm$ 0.02            | 0.23 $\pm$ 0.001             |
| DP ( $\mu$ g P/L)           | 5.51 $\pm$ 0.02                 | 7.14 $\pm$ 0.14                 | 60.08 $\pm$ 12.79            | 19.34 $\pm$ 1.44           | 6.72 $\pm$ 1.56            | 3.56 $\pm$ 0.21              |

**Table S9.** Environmental conditions of lake water samples in mesocosms with dose of 35 mgFe/L at T48 (Mean  $\pm$  standard deviation).

| Parameters                  | Missisquoi Bay                  |                                 |                              | Petit-Lac-St-François      |                            |                              |
|-----------------------------|---------------------------------|---------------------------------|------------------------------|----------------------------|----------------------------|------------------------------|
|                             | Event A<br>September 12<br>2018 | Event B<br>September 26<br>2018 | Event C<br>August 15<br>2019 | Event a<br>June 28<br>2019 | Event b<br>July 26<br>2019 | Event c<br>August 07<br>2019 |
| Chlorophyll- <i>a</i> (RFU) | -                               | -                               | 1.05 $\pm$ 0.002             | 0.01 $\pm$ 0.00            | 0.09 $\pm$ 0.007           | 0.01 $\pm$ 0.00              |
| Phycocyanin (RFU)           | -                               | -                               | 29.69 $\pm$ 1.13             | 0.05 $\pm$ 0.00            | 0.11 $\pm$ 0.00            | 0.015 $\pm$ 0.007            |
| pH                          | 3.95 $\pm$ 0.08                 | -                               | 4.01 $\pm$ 0.13              | 4.47 $\pm$ 0.15            | 4.1 $\pm$ 0.02             | 4.01 $\pm$ 0.05              |
| TDS (mg/L)                  | 198 $\pm$ 0.00                  | -                               | 221.5 $\pm$ 9.81             | 285.01 $\pm$ 7.12          | 228.00 $\pm$ 0.00          | 296.50 $\pm$ 2.12            |
| Temp (°C)                   | 21.05 $\pm$ 0.01                | -                               | 22.83 $\pm$ 0.12             | 27.73 $\pm$ 0.33           | 25.26 $\pm$ 0.03           | 24.69 $\pm$ 0.33             |
| TOC (mg C/L)                | 4.01 $\pm$ 0.06                 | 2.18 $\pm$ 0.09                 | 22.02 $\pm$ 0.41             | 5.68 $\pm$ 0.34            | 2.27 $\pm$ 0.31            | 1.68 $\pm$ 0.01              |
| DOC (mg C/L)                | 3.71 $\pm$ 0.01                 | 2.41 $\pm$ 0.03                 | 21.07 $\pm$ 0.91             | 7.31 $\pm$ 0.10            | 1.87 $\pm$ 0.21            | 1.87 $\pm$ 0.10              |
| TN (mg N/L)                 | 0.67 $\pm$ 0.01                 | 1.07 $\pm$ 0.02                 | 4.06 $\pm$ 0.15              | 0.95 $\pm$ 0.01            | 0.28 $\pm$ 0.007           | 0.29 $\pm$ 0.007             |
| TP ( $\mu$ g P/L)           | 8.83 $\pm$ 0.56                 | 109.97 $\pm$ 23.21              | 146.44 $\pm$ 7.81            | 29.29 $\pm$ 0.73           | 6.58 $\pm$ 1.71            | 4.86 $\pm$ 0.82              |
| DN (mg N/L)                 | 0.63 $\pm$ 0.001                | 0.41 $\pm$ 0.007                | 2.93 $\pm$ 0.08              | 0.72 $\pm$ 0.04            | 0.25 $\pm$ 0.001           | 0.27 $\pm$ 0.00              |
| DP ( $\mu$ g P/L)           | 7.11 $\pm$ 0.04                 | 6.92 $\pm$ 0.04                 | 64.71 $\pm$ 4.23             | 17.99 $\pm$ 2.02           | 4.49 $\pm$ 0.11            | 4.01 $\pm$ 0.19              |

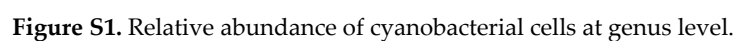

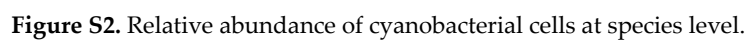

**Figure S2.** Relative abundance of cyanobacterial cells at species level.

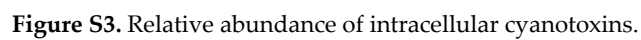



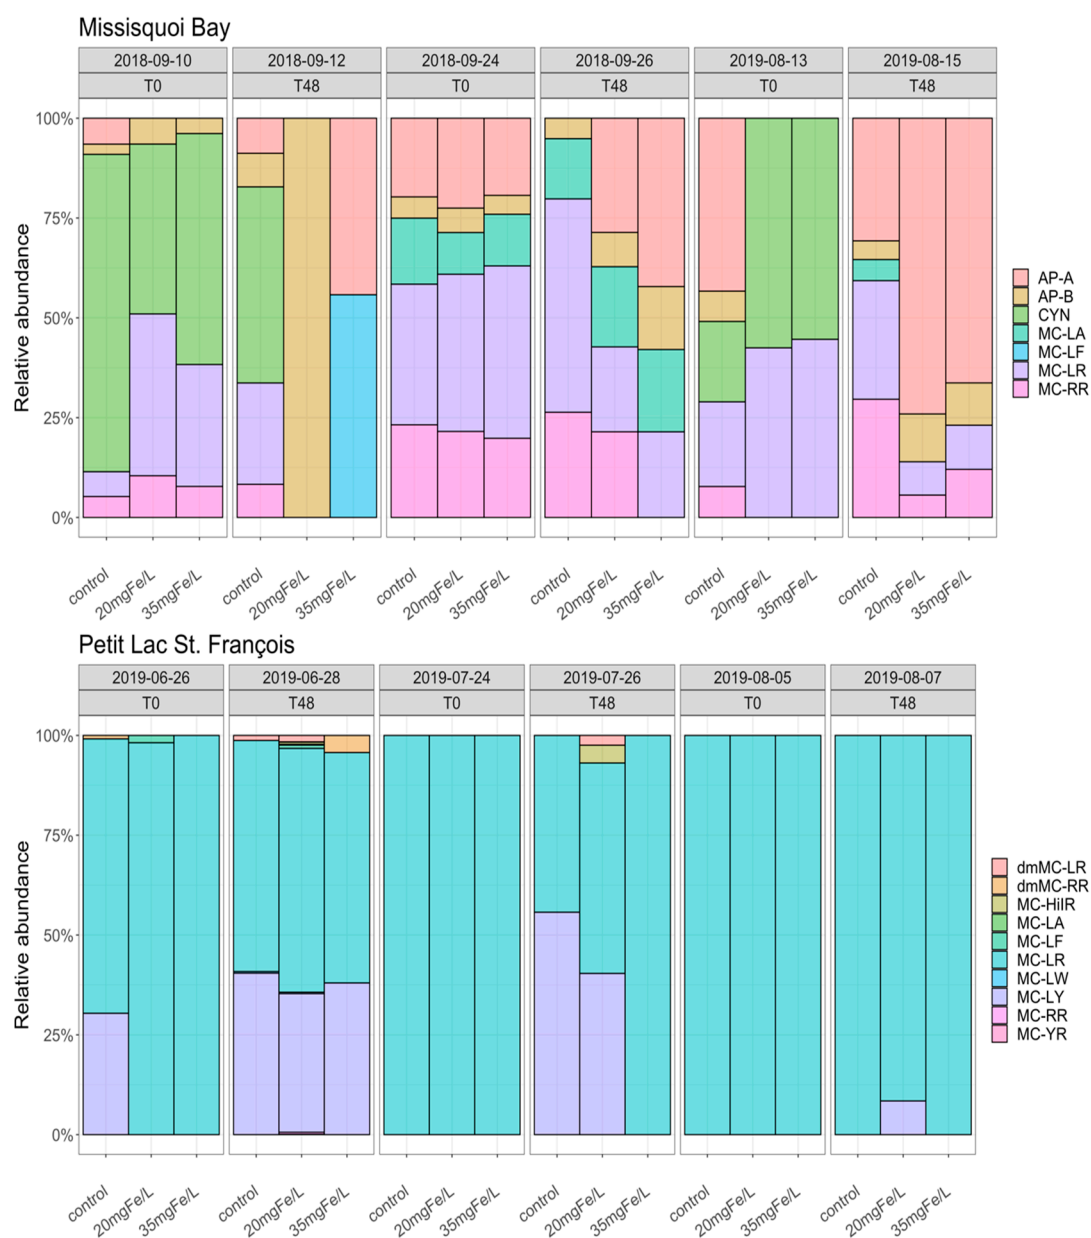

**Figure S4.** Relative abundance of extracellular cyanotoxins.

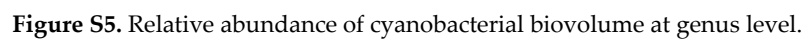

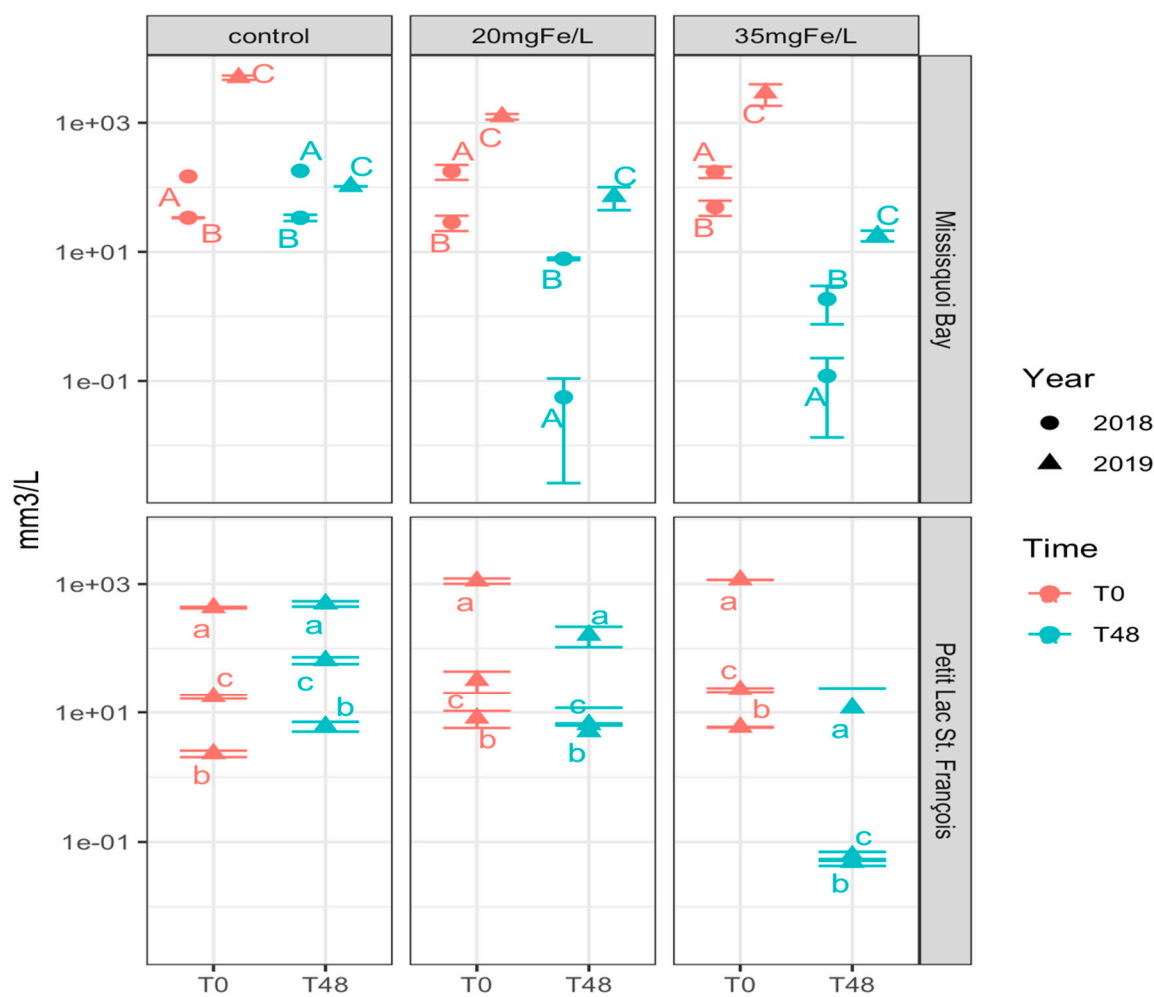

**Figure S6.** Total cyanobacterial biovolume (Mean  $\pm$  standard deviation): A) September 10-12, 2018; B) September 24-26, 2018; C) August 13-15, 2019; a) June 26-28, 2019; b) July 24-26, 2019; c) August 05-07, 2019.

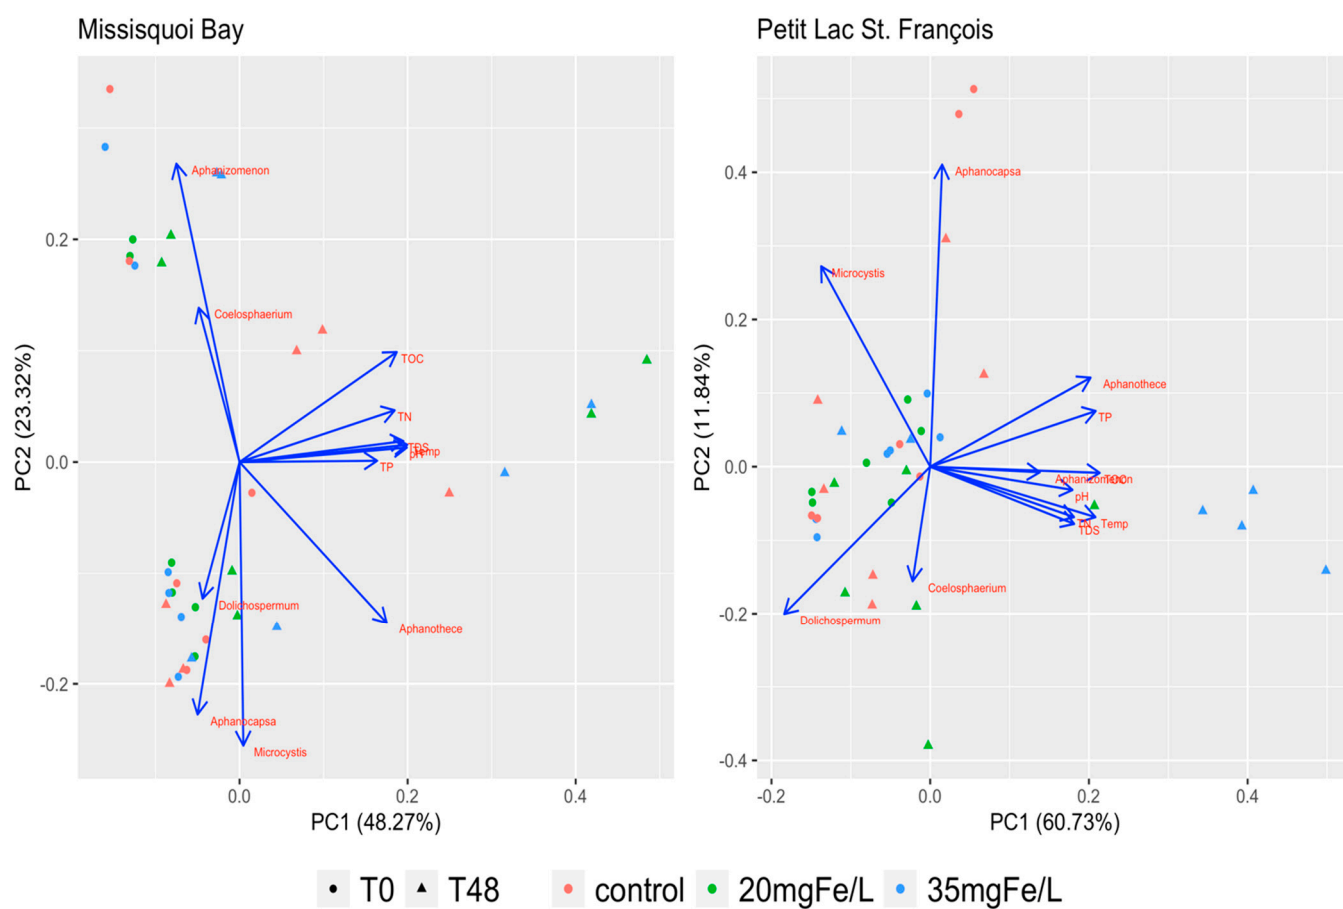

**Figure S7.** Principal component analysis (PCA) of cyanobacterial cell counts respect to environmental conditions in control, 20 mgFe/L and 35 mgFe/L mesocosms in Missisquoi Bay and Petit Lac St. François.

## References

1. Merel, S.; Walker, D.; Chicana, R.; Snyder, S.; Baurès, E.; Thomas, O. State of knowledge and concerns on cyanobacterial blooms and cyanotoxins. *Environment International* **2013**, *59*, 303–327, <https://doi.org/10.1016/j.envint.2013.06.013>.
